# Supplementary material for: Persistent poor glycaemic control in individuals with type 2 diabetes in developing countries: 12 years of real-world evidence of the International Diabetes Management Practices Study (IDMPS)
Source: Springer Nature journal article supplement (doi:10.1007/s00125-019-05078-3), 2020-01-04
Supplement: MOESM1 [file 17652200]

## Electronic Supplementary Material (ESM)

**ESM Table 1. Included countries, by region**

| <i>Region</i>        | <i>Waves of participation</i> | <i>Included countries<sup>a</sup></i>                                                                                                              |
|----------------------|-------------------------------|----------------------------------------------------------------------------------------------------------------------------------------------------|
| <i>Africa</i>        | All                           | Algeria, Morocco, Tunisia, Egypt, South Africa, Senegal, Ivory Coast, Cameroon, Nigeria, Kenya, Zimbabwe, Madagascar, Democratic Republic of Congo |
| <i>Asia</i>          | 1–3, 5–7                      | China, Hong Kong, Indonesia, Thailand, Malaysia, Taiwan, Korea, India, Pakistan, Bangladesh                                                        |
| <i>Eurasia</i>       | 5–7                           | Russia, Ukraine, Kazakhstan, Uzbekistan, Azerbaijan, Georgia                                                                                       |
| <i>Europe</i>        | 1–5                           | Bosnia and Herzegovina, Romania, Bulgaria, Turkey                                                                                                  |
| <i>Latin America</i> | 1–5                           | Argentina, Colombia, Venezuela, Ecuador, Chile, Guatemala, Panama, Dominican Republic, Mexico                                                      |
| <i>Middle East</i>   | 2–7                           | United Arab Emirates, Kuwait, Iran, Iraq, Kingdom of Saudi Arabia, Jordan, Lebanon                                                                 |

<sup>a</sup>Not all countries in each region were included in each wave

**ESM Table 2. HbA<sub>1c</sub> screening, frequency and measurements by therapy type subgroup**

| <i>Tests for HbA<sub>1c</sub></i>     | <i>Wave 1 (2005)</i><br>N=9918 | <i>Wave 2 (2006)</i><br>N=17,232 | <i>Wave 3 (2008)</i><br>N=12,210 | <i>Wave 4 (2010)</i><br>N=5343 | <i>Wave 5 (2011–12)</i><br>N=9603 | <i>Wave 6 (2013–14)</i><br>N=5479 | <i>Wave 7 (2016–17)</i><br>N=6303 |
|---------------------------------------|--------------------------------|----------------------------------|----------------------------------|--------------------------------|-----------------------------------|-----------------------------------|-----------------------------------|
| <i>OGLDs only</i>                     | N=6389                         | N=11,403                         | N=7979                           | N=3530                         | N=5912                            | N=3321                            | N=3637                            |
| Patients screened, n (%)              | 3767 (59.1)                    | 7998 (74.2)                      | 5910 (79.0)                      | 2869 (84.3)                    | 5105 (88.6)                       | 3007 (92.0)                       | 3284 (92.6)                       |
| Frequency of testing during past year | 1.6 (1.2)                      | 2.2 (1.4)                        | 2.2 (1.4)                        | 2.1 (1.6)                      | 2.1 (2.1)                         | 2.2 (1.6)                         | 2.2 (1.9)                         |
| Last measurement (%)                  | 7.50 (1.66)                    | 7.62 (1.79)                      | 7.50 (1.78)                      | 7.53 (1.67)                    | 7.65 (1.77)                       | 7.67 (1.68)                       | 7.65 (1.72)                       |
| <i>OGLDs + insulin</i>                | N=1632                         | N=3220                           | N=2617                           | N=1374                         | N=2304                            | N=1446                            | N=1936                            |
| Patients screened, n (%)              | 1147 (70.5)                    | 2672 (86.6)                      | 2159 (86.7)                      | 1192 (89.7)                    | 2127 (94.1)                       | 1348 (94.7)                       | 1793 (94.2)                       |
| Frequency of testing during past year | 1.7 (1.2)                      | 2.3 (1.4)                        | 2.5 (1.4)                        | 2.4 (1.4)                      | 2.3 (1.2)                         | 2.3 (2.1)                         | 2.3 (1.4)                         |
| Last measurement (%)                  | 8.29 (1.77)                    | 8.65 (1.98)                      | 8.56 (2.08)                      | 8.60 (1.93)                    | 8.63 (1.92)                       | 8.63 (1.75)                       | 8.62 (1.84)                       |
| <i>Insulin only</i>                   | N=1600                         | N=1911                           | N=1222                           | N=323                          | N=1217                            | N=633                             | N=660                             |
| Patients screened, n (%)              | 1032 (64.9)                    | 1410 (78.6)                      | 931 (82.8)                       | 263 (85.9)                     | 1043 (90.5)                       | 534 (87.8)                        | 581 (90.8)                        |
| Frequency of testing during past year | 1.5 (1.2)                      | 2.0 (1.5)                        | 2.5 (1.6)                        | 2.3 (1.2)                      | 2.1 (1.3)                         | 2.2 (3.4)                         | 2.0 (1.2)                         |
| Last measurement (%)                  | 8.38 (1.96)                    | 8.50 (2.13)                      | 8.53 (2.03)                      | 8.62 (2.21)                    | 8.70 (2.08)                       | 8.50 (1.82)                       | 8.75 (2.28)                       |

Mean (SD) values are presented unless otherwise stated. Percentages were calculated for patients with available data; these varied by each category/wave. OGLD, oral glucose-lowering drug; SD, standard deviation

**ESM Table 3. Proportion of patients achieving different HbA<sub>1c</sub> goals in each wave**

| <i>HbA<sub>1c</sub></i>                              | <i>Wave 1 (2005)</i><br><i>N=9918</i> | <i>Wave 2 (2006)</i><br><i>N=17,232</i> | <i>Wave 3 (2008)</i><br><i>N=12,210</i> | <i>Wave 4 (2010)</i><br><i>N=5343</i> | <i>Wave 5 (2011–12)</i><br><i>N=9603</i> | <i>Wave 6 (2013–14)</i><br><i>N=5479</i> | <i>Wave 7 (2016–17)</i><br><i>N=6303</i> |
|------------------------------------------------------|---------------------------------------|-----------------------------------------|-----------------------------------------|---------------------------------------|------------------------------------------|------------------------------------------|------------------------------------------|
| <i>&lt;53</i><br><i>mmol/mol</i><br><i>(&lt;7 %)</i> | 2168 (36.0)                           | 4275 (35.2)                             | 3446 (38.0)                             | 1625 (37.1)                           | 2658 (31.8)                              | 1449 (29.4)                              | 1716 (30.1)                              |
| <i>53–64</i><br><i>mmol/mol</i><br><i>(7–8 %)</i>    | 1678 (27.9)                           | 3304 (27.2)                             | 2358 (26.0)                             | 1166 (26.6)                           | 2366 (28.3)                              | 1480 (30.0)                              | 1677 (29.4)                              |
| <i>65–75</i><br><i>mmol/mol</i><br><i>(8–9 %)</i>    | 971 (16.1)                            | 1817 (15.0)                             | 1292 (14.3)                             | 648 (14.8)                            | 1376 (16.5)                              | 863 (17.5)                               | 936 (16.4)                               |
| <i>&gt;75</i><br><i>mmol/mol</i><br><i>(&gt;9 %)</i> | 1208 (20.0)                           | 2752 (22.7)                             | 1964 (21.7)                             | 943 (21.5)                            | 1947 (23.3)                              | 1139 (23.1)                              | 1366 (24.0)                              |

n (%) data are presented unless otherwise stated. Percentages were calculated for patients with available data; these varied by each category/wave.

**ESM Table 4. Use of OGLDs split according to number of OGLD agents in patients with type 2 diabetes between wave 4 and wave 7 (2010–2017)**

|               |          | <i>Biguanides</i> | <i>Sulphonylureas</i> | <i>DPP-4i</i> | <i>TZD</i> | <i>Alpha-glucosidase inhibitors</i> | <i>Glinides</i> | <i>SGLT-2i<sup>a</sup></i> |
|---------------|----------|-------------------|-----------------------|---------------|------------|-------------------------------------|-----------------|----------------------------|
| <i>Wave 4</i> | 1 OGLD   | 1246 (54.1)       | 307 (13.3)            | 54 (2.3)      | 54 (2.3)   | 15 (0.7)                            | 18 (0.8)        | –                          |
|               | 2 OGLDs  | 1682 (84.5)       | 1427 (71.7)           | 236 (11.9)    | 270 (13.6) | 55 (2.8)                            | 78 (3.9)        | –                          |
|               | >2 OGLDs | 459 (84.1)        | 451 (82.6)            | 244 (44.7)    | 326 (59.7) | 73 (13.4)                           | 54 (9.9)        | –                          |
| <i>Wave 5</i> | 1 OGLD   | 2342 (51.6)       | 714 (15.7)            | 50 (1.1)      | 17 (0.4)   | 38 (0.8)                            | 41 (0.9)        | –                          |
|               | 2 OGLDs  | 2450 (81.6)       | 2335 (77.8)           | 217 (7.2)     | 200 (6.7)  | 136 (4.5)                           | 106 (3.5)       | –                          |
|               | >2 OGLDs | 571 (85.2)        | 532 (79.4)            | 271 (40.4)    | 299 (44.6) | 172 (25.7)                          | 47 (7.0)        | –                          |
| <i>Wave 6</i> | 1 OGLD   | 1459 (77.8)       | 306 (16.3)            | 87 (4.6)      | 7 (0.4)    | 3 (0.2)                             | 14 (0.7)        | –                          |
|               | 2 OGLDs  | 2200 (94.7)       | 1774 (76.4)           | 510 (22.0)    | 53 (2.3)   | 43 (1.9)                            | 64 (2.8)        | –                          |
|               | >2 OGLDs | 565 (99.5)        | 540 (95.1)            | 447 (78.7)    | 103 (18.1) | 63 (11.1)                           | 19 (3.3)        | –                          |
| <i>Wave 7</i> | 1 OGLD   | 1638 (77.1)       | 257 (12.1)            | 136 (6.4)     | 15 (0.7)   | 17 (0.8)                            | 41 (1.9)        | 21 (1.0)                   |
|               | 2 OGLDs  | 2352 (94.5)       | 1708 (68.6)           | 697 (28.0)    | 35 (1.4)   | 41 (1.6)                            | 82 (3.3)        | 63 (2.5)                   |
|               | >2 OGLDs | 793 (98.4)        | 703 (87.2)            | 605 (75.1)    | 96 (11.9)  | 104 (12.9)                          | 28 (3.5)        | 89 (11.0)                  |

n (%) data are presented unless otherwise stated. Percentages were calculated for patients with available data; these varied by each category/wave.

<sup>a</sup>Data on SGLT-2i use were only recorded in wave 7.

**ESM Table 5. Types of insulin used (overall population)**

|                               | <i>Wave 6 (2013–14)</i><br>N=5479 | <i>Wave 7 (2016–17)</i><br>N=6303 |
|-------------------------------|-----------------------------------|-----------------------------------|
| <i>Basal insulin</i>          | N=1401                            | N=1576                            |
| Long-acting insulin analogue  | 930 (66.6)                        | 1167 (74.1)                       |
| Intermediate human insulin    | 452 (32.4)                        | 384 (24.4)                        |
| Biosimilar insulin            | 14 (1.0)                          | 24 (1.5)                          |
| <i>Prandial insulin</i>       | N=704                             | N=804                             |
| Short-acting insulin analogue | 368 (52.3)                        | 434 (54.0)                        |
| Rapid-acting human insulin    | 330 (46.9)                        | 369 (46.0)                        |
| Biosimilar insulin            | 5 (0.7)                           | 2 (0.2)                           |
| <i>Premix insulin</i>         | N=674                             | N=993                             |
| Insulin analogue              | 262 (39.0)                        | 411 (42.3)                        |
| Human insulin                 | 409 (61.0)                        | 561 (57.8)                        |

n (%) data are presented unless otherwise stated. Percentages were calculated for patients with available data; these varied by each category/wave.

**ESM Table 6. Blood glucose monitoring, for overall population (A) and by therapy type subgroup (B)**

**A**

| <i>Characteristic</i>                                               | <i>Wave 1 (2005)</i><br><i>N=9918</i> | <i>Wave 2 (2006)</i><br><i>N=17,232</i> | <i>Wave 3 (2008)</i><br><i>N=12,210</i> | <i>Wave 4 (2010)</i><br><i>N=5343</i> | <i>Wave 5 (2011–12)</i><br><i>N=9603</i> | <i>Wave 6 (2013–14)</i><br><i>N=5479</i> | <i>Wave 7 (2016–17)</i><br><i>N=6303</i> |
|---------------------------------------------------------------------|---------------------------------------|-----------------------------------------|-----------------------------------------|---------------------------------------|------------------------------------------|------------------------------------------|------------------------------------------|
| <i>Fasting blood glucose testing performed, n (%)</i>               | 9458 (95.4)                           | 15,158 (88.0)                           | 11,694 (95.8)                           | 5126 (95.9)                           | 8654 (90.5)                              | 4997(91.2)                               | 5504 (87.3)                              |
| <i>Possession of glucose meter, n (%)<sup>†</sup></i>               | 3274 (33.1)                           | \                                       | 5740 (47.4)                             | 3166 (59.7)                           | 5757 (60.4)                              | 3671 (67.6)                              | 4393 (70.3)                              |
| <i>Cost as limiting factor for regular SMBG, n (%)<sup>††</sup></i> | \                                     | \                                       | 2444 (43.8)                             | 1431 (45.9)                           | 2584 (47.0)                              | 1869 (53.7)                              | 2316 (55.3)                              |

n (%) data are presented unless otherwise stated. Percentages were calculated for patients with available data; these varied by each category/wave.

SD, standard deviation; SMBG, self-monitoring blood glucose

<sup>†</sup>Data not available for Wave 2; <sup>††</sup>Data not available for Waves 1 and 2

**B**

| <i>Characteristic</i>                                               | <i>Wave 1 (2005)</i><br>N=9918 | <i>Wave 2 (2006)</i><br>N=17,232 | <i>Wave 3 (2008)</i><br>N=12,210 | <i>Wave 4 (2010)</i><br>N=5343 | <i>Wave 5 (2011–12)</i><br>N=9603 | <i>Wave 6 (2013–14)</i><br>N=5479 | <i>Wave 7 (2016–17)</i><br>N=6303 |
|---------------------------------------------------------------------|--------------------------------|----------------------------------|----------------------------------|--------------------------------|-----------------------------------|-----------------------------------|-----------------------------------|
| <i>OGLDs only</i>                                                   | N=6389                         | N=11,403                         | N=7979                           | N=3530                         | N=5912                            | N=3321                            | N=3637                            |
| <i>Fasting blood glucose testing performed, n (%)</i>               | 6110<br>(95.6)                 | 10092<br>(88.5)                  | 7663<br>(96.0)                   | 3372<br>(95.5)                 | 5292<br>(89.9)                    | 3004<br>(90.5)                    | 3151<br>(86.6)                    |
| <i>Possession of glucose meter, n (%)<sup>†</sup></i>               | 1543<br>(24.2)                 | \                                | 3089<br>(39.1)                   | 1862<br>(53.2)                 | 3051<br>(52.1)                    | 2003<br>(61.0)                    | 2267<br>(62.9)                    |
| <i>Cost as limiting factor for regular SMBG, n (%)<sup>††</sup></i> | \                              | \                                | 1239<br>(41.4)                   | 825<br>(45.2)                  | 1315<br>(45.0)                    | 933<br>(49.2)                     | 1150<br>(53.4)                    |
| <i>OGLDs + insulin</i>                                              | N=1632                         | N=3220                           | N=2617                           | N=1374                         | N=2304                            | N=1446                            | N=1936                            |
| <i>Fasting blood glucose testing performed, n (%)</i>               | 1547<br>(94.8)                 | 2753<br>(85.5)                   | 2515<br>(96.1)                   | 1331<br>(96.9)                 | 2116<br>(92.3)                    | 1341<br>(92.7)                    | 1716<br>(88.6)                    |
| <i>Possession of glucose meter, n (%)<sup>†</sup></i>               | 859<br>(52.7)                  | \                                | 1758<br>(67.6)                   | 1019<br>(74.3)                 | 1747<br>(76.3)                    | 1151<br>(80.3)                    | 1587<br>(82.5)                    |
| <i>Cost as limiting factor for regular SMBG, n (%)<sup>††</sup></i> | \                              | \                                | 788<br>(45.8)                    | 463<br>(45.8)                  | 810<br>(48.9)                     | 619<br>(57.0)                     | 845<br>(55.7)                     |
| <i>Insulin only</i>                                                 | N=1600                         | N=1911                           | N=1222                           | N=323                          | N=1217                            | N=633                             | N=660                             |
| <i>Fasting blood glucose testing performed, n (%)</i>               | 1525<br>(95.3)                 | 1718<br>(89.9)                   | 1151<br>(94.2)                   | 314<br>(97.2)                  | 1106<br>(91.3)                    | 588<br>(92.9)                     | 580<br>(87.9)                     |
| <i>Possession of glucose meter, n (%)<sup>†</sup></i>               | 805<br>(50.4)                  | \                                | 806<br>(66.3)                    | 252<br>(78.3)                  | 921<br>(76.0)                     | 492<br>(77.8)                     | 515<br>(78.7)                     |
| <i>Cost as limiting factor for regular SMBG, n (%)<sup>††</sup></i> | \                              | \                                | 383<br>(48.9)                    | 130<br>(52.4)                  | 438<br>(49.8)                     | 304<br>(64.3)                     | 311<br>(62.6)                     |

n (%) data are presented unless otherwise stated. Percentages were calculated for patients with available data; these varied by each category/wave.

OGLD, oral glucose-lowering drug; SD, standard deviation; SMBG, self-monitoring blood glucose

<sup>††</sup>Data not available for Wave 2; <sup>††</sup>Data not available for Waves 1 and 2

**ESM Table 7. Diabetes education (overall population)**

| <i>Characteristic</i>                                             | <i>Wave 1 (2005)</i><br><i>N=9918</i> | <i>Wave 2 (2006)</i><br><i>N=17,232</i> | <i>Wave 3 (2008)</i><br><i>N=12,210</i> | <i>Wave 4 (2010)</i><br><i>N=5343</i> | <i>Wave 5 (2011–12)</i><br><i>N=9603</i> | <i>Wave 6 (2013–14)</i><br><i>N=5479</i> | <i>Wave 7 (2016–17)</i><br><i>N=6303</i> |
|-------------------------------------------------------------------|---------------------------------------|-----------------------------------------|-----------------------------------------|---------------------------------------|------------------------------------------|------------------------------------------|------------------------------------------|
| <i>Proportion of patients receiving diabetes education, n (%)</i> | 5715 (59.0)                           | 7186 (42.6)                             | 6508 (55.1)                             | 3093 (59.0)                           | 6794 (71.3)                              | 3974 (73.3)                              | 4871 (78.3)                              |
| <i>Person who delivered education, n (%)*</i>                     |                                       |                                         |                                         |                                       |                                          |                                          |                                          |
| <i>Peer</i>                                                       | 0                                     | 0                                       | 0                                       | 160 (5.2)                             | 502 (7.4)                                | 274 (6.9)                                | 326 (6.7)                                |
| <i>Nurse</i>                                                      | 0                                     | 0                                       | 0                                       | 762 (24.6)                            | 1513 (22.3)                              | 839 (21.1)                               | 1348 (27.7)                              |
| <i>Certified diabetes educator</i>                                | 0                                     | 0                                       | 0                                       | 467 (15.1)                            | 1042 (15.3)                              | 805 (20.3)                               | 1394 (28.7)                              |
| <i>Dietitian/nutritionist</i>                                     | 0                                     | 0                                       | 0                                       | 824 (26.6)                            | 1512 (22.3)                              | 660 (16.6)                               | 1385 (28.5)                              |
| <i>Physician</i>                                                  | 0                                     | 0                                       | 0                                       | 2313 (74.8)                           | 5276 (77.7)                              | 3053 (76.8)                              | 3468 (71.3)                              |
| <i>Format of programme, n (%)**</i>                               |                                       |                                         |                                         |                                       |                                          |                                          |                                          |
| <i>Structured courses</i>                                         | 0                                     | 0                                       | 0                                       | 0                                     | 605 (8.9)                                | 415 (10.4)                               | 755 (15.5)                               |
| <i>Individual</i>                                                 | 4361 (77.4)                           | 5484 (78.4)                             | 5388 (83.2)                             | 2441 (80.0)                           | 4865 (71.6)                              | 2567 (64.6)                              | 3163 (65.0)                              |
| <i>Group</i>                                                      | 1309 (23.2)                           | 2298 (32.9)                             | 1708 (26.4)                             | 669 (21.9)                            | 1761 (25.9)                              | 1174 (29.5)                              | 1515 (31.1)                              |

n (%) data are presented unless otherwise stated. Percentages were calculated for patients with available data; these varied by each category/wave.

\*Patient could receive education from more than one source; \*\*Patient could undertake education in more than one format



**ESM Figure 1. Insulin therapies by therapy type subgroup**

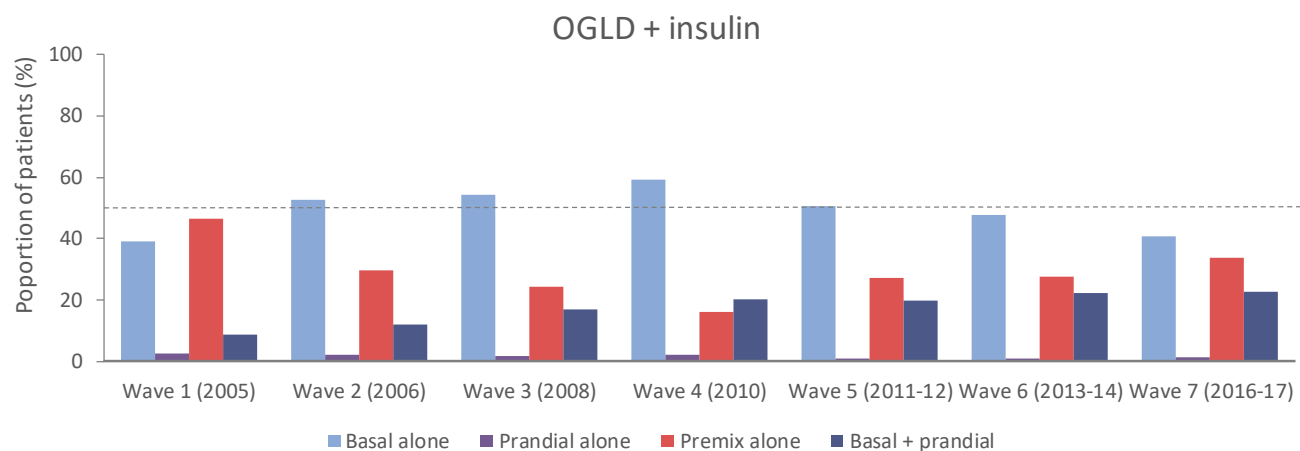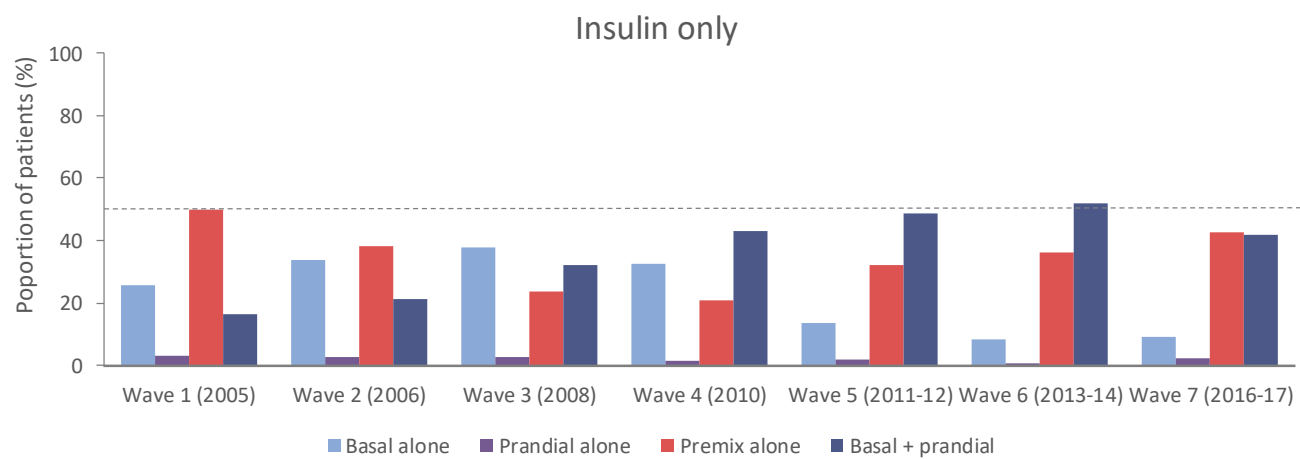

n (%) data are presented unless otherwise stated. Percentages were calculated for patients with available data; these varied by each category/wave. OGLD, oral glucose-lowering drug
